# Supplementary material
Source: publisher figshare collection journal article supplement (https://acs.figshare.com/ndownloader/files/3891442)
Supplement: Supplementary file 1 [file 3891442]

## Supplementary Information

### The Solid-State Growth of One- and Two-Dimensional Silica Structures on Metal Surfaces

Ferdaous Ben Romdhane<sup>1</sup>, Torbjörn Björkman<sup>2</sup>, Arkady V. Krasheninnikov<sup>2</sup>, Florian Banhart<sup>1\*</sup>

<sup>1</sup> Institut de Physique et Chimie des Matériaux, UMR 7504 CNRS, Université de Strasbourg, 23 rue du Loess, 67034 Strasbourg, France

<sup>2</sup> Department of Applied Physics, Aalto University, P.O. Box 11100, FI-00076 Aalto, Finland

\* e-mail: Florian.Banhart@ipcms.unistra.fr. Phone: +33-388-107103

### Supplementary Videos

#### Video 1:

The video shows the nucleation and growth of linear silica structures on the (100)-surface of Fe. The temperature during growth was 470°C. The video is shown with a factor 9 time-lapse.

#### Video 2:

Another example of growth on a (100)-surface of Fe is shown. The spreading of linear and cellular structures on the Fe surface is visible. The video is shown with a factor 7 time-lapse
